# Supplementary material for: Through space charge-transfer emission in lambda (Λ)-shaped triarylboranes and the use in fluorescent sensing for fluoride and cyanide ions
Source: Royal Society of Chemistry journal article supplement (doi:10.1039/c5ra07912h), 2015-01-01
Supplement: c5ra07912h1.pdf [file c5ra07912h1.pdf]

**Supporting Information:**

**Through Space Charge-Transfer Emission in Lambda ( $\Lambda$ )-  
Shaped Triarylboranes and the Use in Fluorescent Sensing for  
Fluoride and Cyanide ions**

He Xi,<sup>a,b</sup> Yang Liu,<sup>b</sup> Chun-Xue Yuan,<sup>c</sup> Ye-Xin Li,<sup>d</sup> Lei Wang,<sup>b</sup> Xu-Tang Tao,<sup>\*b</sup> Xiao-Hua Ma,<sup>\*a</sup>  
Chun-Fu Zhang<sup>\*e</sup> and Yue Hao<sup>\*a, e</sup>

<sup>a</sup> School of Advanced Materials and Nanotechnology, Xidian University, 2 South Taibai Road, Xi'an  
710071, P. R. China, Email: [xhma@xidian.edu.cn](mailto:xhma@xidian.edu.cn)

<sup>b</sup> State Key Laboratory of Crystal Materials, Shandong University, Jinan 250100, P. R. China, Email:  
[txt@sdu.edu.cn](mailto:txt@sdu.edu.cn)

<sup>c</sup> College of Materials Science and Engineering, Tongji University, Caoan Road 4800, Shanghai,  
201804, P. R. China.

<sup>d</sup> School of Chemistry and Chemical Engineering, Jinan University, Jinan 250022, P. R. China

<sup>e</sup> Key Lab of Wide Band-Gap Semiconductor Materials and Devices, Xidian University, 2 South  
Taibai Road, Xi'an 710071, P. R. China, Email: [cfzhang@xidian.edu.cn](mailto:cfzhang@xidian.edu.cn), [yhao@xidian.edu.cn](mailto:yhao@xidian.edu.cn)

**Table of Contents**

|                                                                                         |     |
|-----------------------------------------------------------------------------------------|-----|
| Photophysical Properties of <b>TBBN</b> , <b>TBBN2</b> , <b>TBB</b> and <b>TBNN</b>     | S2  |
| Theoretical Calculations                                                                | S4  |
| X-ray Crystal Structure Analysis                                                        | S6  |
| Titration Measurement                                                                   | S8  |
| NMR Titrations of <b>TBBN</b> , <b>TBBN2</b> and <b>TBB</b> with Fluoride               | S20 |
| Selectivity of <b>TBBN</b> , <b>TBBN2</b> and <b>TBB</b> for Fluoride and Cyanide Ions  | S23 |
| High Resolution Mass Spectra of <b>TBBN</b> , <b>TBBN2</b> , <b>TBB</b> and <b>TBNN</b> | S26 |

## Photophysical properties

Solvent dependent absorption and PL spectra of TBBN, TBBN2, TBB and TBNN.

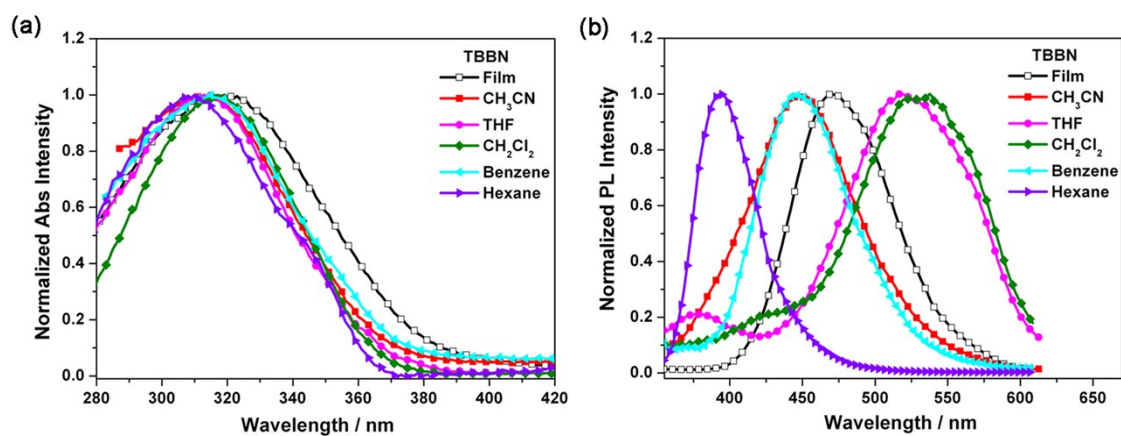

Fig. S1. Absorption (a) and PL spectra (b) of TBBN in various solvents and thin film.

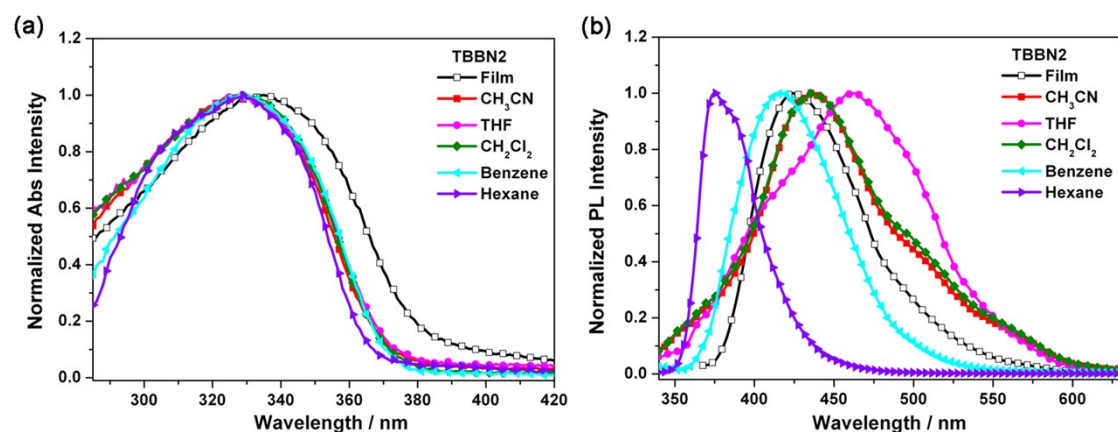

Fig. S2. Absorption (a) and PL spectra (b) of TBBN2 in various solvents and thin film.

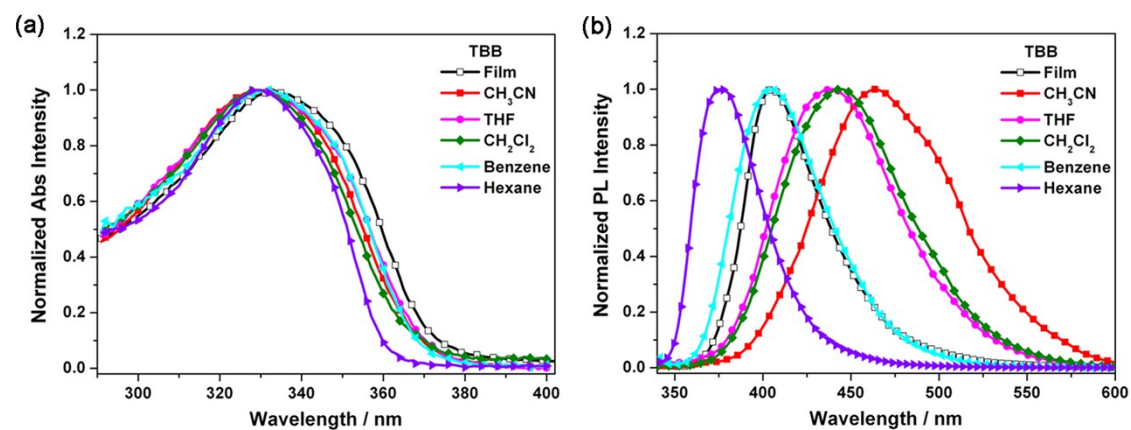

Fig. S3. Absorption (a) and PL spectra (b) of TBB in various solvents and thin film.

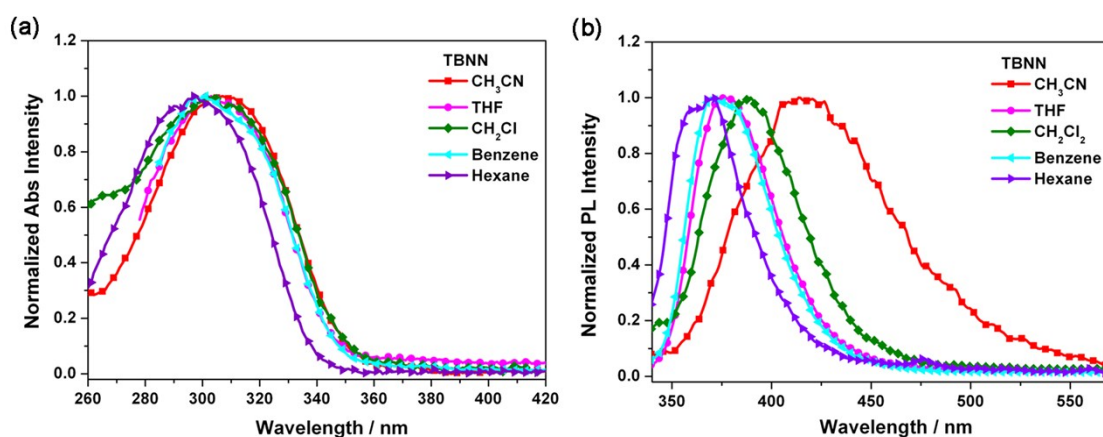

**Fig. S4.** Absorption (a) and PL spectra (b) of **TBNN** in various solvents.

**Table S1.** Absorption and PL Data of **TBBN**, **TBBN2**, **TBB** and **TBNN**.

| Compound     | Solvent                         | $\lambda_{\text{abs}}$ (nm) | $\lambda_{\text{em}}$ (nm) | $\Delta\nu$ (cm <sup>-1</sup> ) <sup>c</sup> | $\Phi_{\text{F}}$ <sup>d</sup> |
|--------------|---------------------------------|-----------------------------|----------------------------|----------------------------------------------|--------------------------------|
| <b>TBBN</b>  | Hexane                          | 310                         | 394 <sup>a</sup>           | 6877                                         | 0.17                           |
|              | Benzene                         | 315                         | 445 <sup>a</sup>           | 9274                                         | 0.14                           |
|              | CH <sub>2</sub> Cl <sub>2</sub> | 317                         | 538 <sup>a</sup>           | 12958                                        | 0.11                           |
|              | THF                             | 313                         | 518 <sup>a</sup>           | 12607                                        | 0.09                           |
|              | MeCN                            | 314                         | 447 <sup>a</sup>           | 9476                                         | 0.10                           |
|              | Film                            | 319                         | 470                        | 10071                                        | 0.07                           |
| <b>TBBN2</b> | Hexane                          | 329                         | 375 <sup>b</sup>           | 3728                                         | 0.26                           |
|              | Benzene                         | 328                         | 418 <sup>b</sup>           | 6564                                         | 0.21                           |
|              | CH <sub>2</sub> Cl <sub>2</sub> | 330                         | 437 <sup>b</sup>           | 7420                                         | 0.14                           |
|              | THF                             | 327                         | 460 <sup>b</sup>           | 8983                                         | 0.11                           |
|              | MeCN                            | 328                         | 436 <sup>b</sup>           | 7552                                         | 0.07                           |
|              | Film                            | 335                         | 424                        | 6266                                         | 0.05                           |
| <b>TBB</b>   | Hexane                          | 329                         | 375                        | 3728                                         | 0.70                           |
|              | Benzene                         | 332                         | 405                        | 5368                                         | 0.88                           |
|              | CH <sub>2</sub> Cl <sub>2</sub> | 329                         | 444                        | 7873                                         | 0.78                           |
|              | THF                             | 330                         | 438                        | 7472                                         | 0.80                           |
|              | MeCN                            | 331                         | 463                        | 8613                                         | 0.56                           |
|              | Film                            | 333                         | 405                        | 5339                                         | 0.04                           |
| <b>TBNN</b>  | Hexane                          | 297                         | 371                        | 6716                                         | 0.51                           |
|              | Benzene                         | 301                         | 370                        | 6196                                         | 0.65                           |
|              | CH <sub>2</sub> Cl <sub>2</sub> | 304                         | 389                        | 7188                                         | 0.60                           |
|              | THF                             | 303                         | 376                        | 6408                                         | 0.58                           |
|              | MeCN                            | 307                         | 414                        | 8419                                         | 0.42                           |

<sup>a</sup>Excited at 313 nm. <sup>b</sup> Excited at 328 nm. <sup>c</sup> Stokes shift. <sup>d</sup> Absolute quantum yields which were determined by a calibrated integrating sphere system.

## Theoretical Calculations

The TD-DFT calculations on **TBB**, **TBBN** and **TBBN2** were performed using the Gaussian 09 program at the B3LYP/6-31G(d) level of theory using the optimized structure geometry. The time-dependent density functional theory (TD-DFT) calculations were conducted at the B3LYP/6-31G(d) level of theory to understand their intramolecular CT transitions.

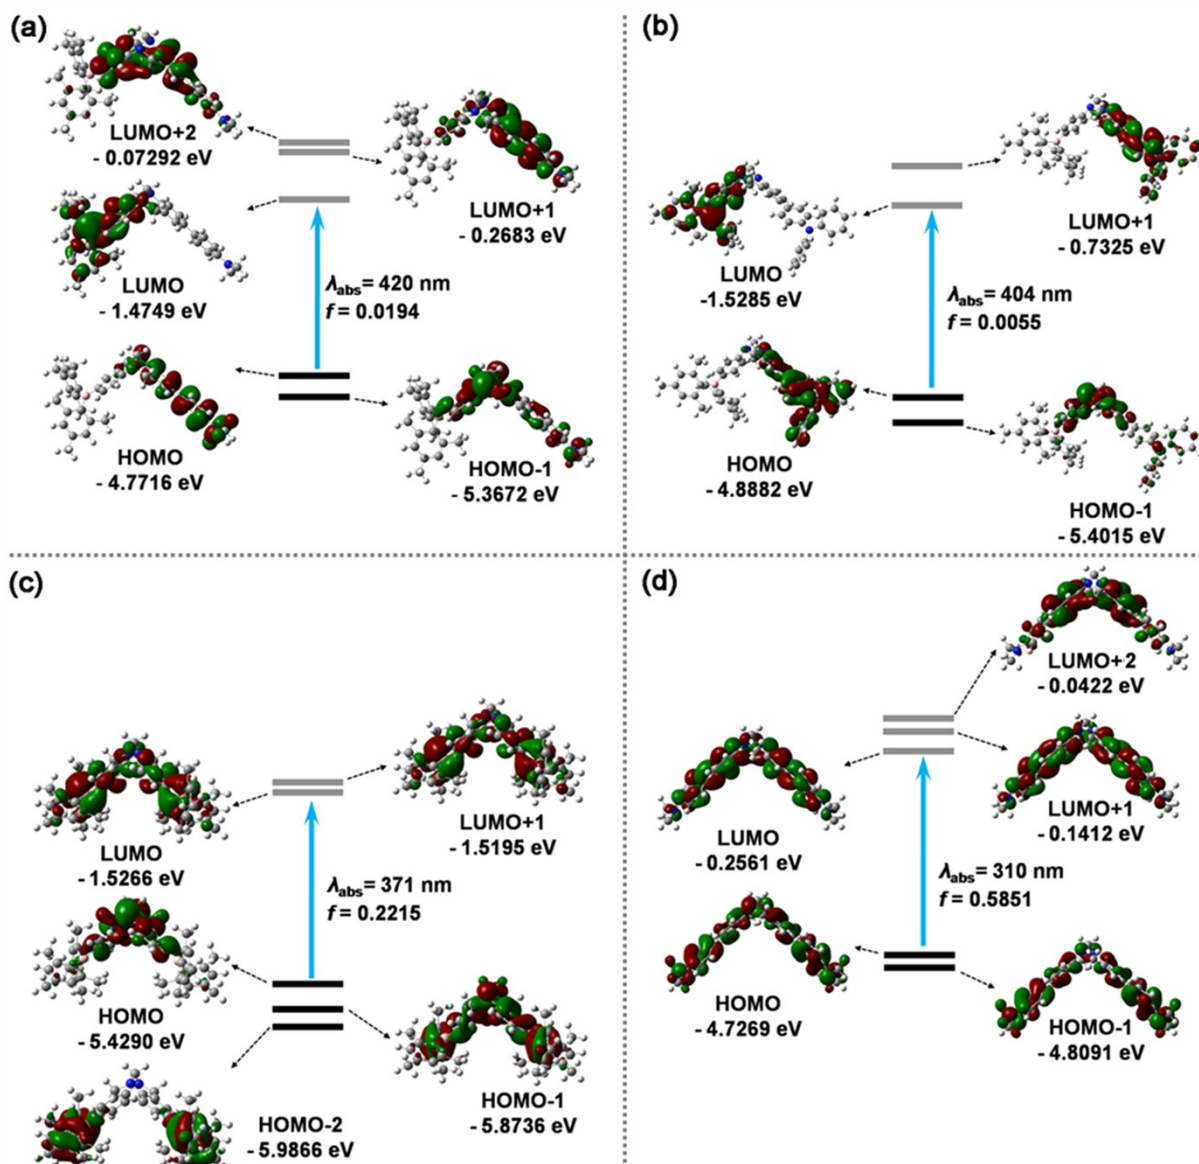

**Fig. S5.** Calculated molecular orbitals of (a) **TBBN**, (b) **TBBN2**, (c) **TBB** and (d) **TBNN**. The transition energies and oscillator strengths ( $f$ ) were calculated at the B3LYP/6-31G(d) level of theory.

**Table S2.** Calculated transition energies, absorption wavelengths, oscillator strength and assignments for compounds **TBBN**, **TBBN2**, **TBB** and **TBNN** calculated at the B3LYP/6-31G level of theory.

| Compound     | Excited state | Transition energies (eV) | Absorption(nm)<br>(oscillator strengths) | Assignments (%)                                                     |
|--------------|---------------|--------------------------|------------------------------------------|---------------------------------------------------------------------|
| <b>TBBN</b>  | 1             | <b>2.95</b>              | <b>420 (0.0194)</b>                      | <b>HOMO→LUMO (69)</b><br>HOMO-1→LUMO (12)                           |
|              | 2             | 3.42                     | 362 (0.161)                              | HOMO-1→LUMO (68)<br>HOMO→LUMO (12)                                  |
|              | 3             | 3.64                     | 362 (0.161)                              | HOMO-3→LUMO (61)<br>HOMO-2→LUMO (32)                                |
|              | 4             | 3.76                     | 330 (0.1242)                             | HOMO-2→LUMO (48)<br>HOMO-4→LUMO (38)<br>HOMO-3→LUMO (30)            |
|              | 5             | 3.88                     | 320 (0.0774)                             | HOMO-4→LUMO (51)<br>HOMO-5→LUMO (40)<br>HOMO-2→LUMO (24)            |
|              | 6             | 3.97                     | 312 (0.0088)                             | HOMO-6→LUMO (70)                                                    |
|              | 7             | 4.04                     | 330 (0.1026)                             | HOMO-5→LUMO (54)<br>HOMO-2→LUMO (27)<br>HOMO-4→LUMO (26)            |
|              | 8             | <b>4.09</b>              | <b>303 (0.2269)</b>                      | <b>HOMO→LUMO+1 (52)</b><br>HOMO→LUMO+2 (34)                         |
|              | 9             | <b>4.20</b>              | <b>295 (0.4618)</b>                      | <b>HOMO→LUMO+2 (53)</b><br>HOMO→LUMO+1 (38)                         |
| <b>TBBN2</b> | 1             | <b>3.07</b>              | <b>404 (0.0055)</b>                      | <b>HOMO→LUMO (68)</b><br>HOMO-1→LUMO (17)                           |
|              | 2             | 3.37                     | 368 (0.1674)                             | HOMO-1→LUMO (67)<br>HOMO→LUMO (68)                                  |
|              | 3             | <b>3.62</b>              | <b>342 (0.3408)</b>                      | <b>HOMO-3→LUMO (55)</b><br>HOMO-2→LUMO (32)<br>HOMO→LUMO+1 (28)     |
|              | 4             | <b>3.66</b>              | <b>338 (0.5517)</b>                      | <b>HOMO→LUMO+1 (61)</b><br>HOMO-3→LUMO (33)                         |
| <b>TBB</b>   | 1             | <b>3.34</b>              | <b>370 (0.2215)</b>                      | <b>HOMO→LUMO (70)</b>                                               |
|              | 2             | 3.39                     | 366 (0.0472)                             | HOMO→LUMO+1 (70)                                                    |
|              | 3             | <b>3.67</b>              | <b>337 (0.2693)</b>                      | <b>HOMO-2→LUMO (47)</b><br>HOMO-3→LUMO+1 (37)<br>HOMO-1→LUMO+1 (37) |
| <b>TBNN</b>  | 1             | <b>3.99</b>              | <b>311 (0.5851)</b>                      | <b>HOMO→LUMO (66)</b><br>HOMO→LUMO+1 (15)                           |
|              | 2             | 4.16                     | 298 (0.0002)                             | HOMO-1→LUMO (51)<br>HOMO→LUMO+1 (42)                                |
|              | 3             | 4.22                     | 294 (0.2593)                             | HOMO→LUMO+2 (63)                                                    |

## X-ray Crystallography

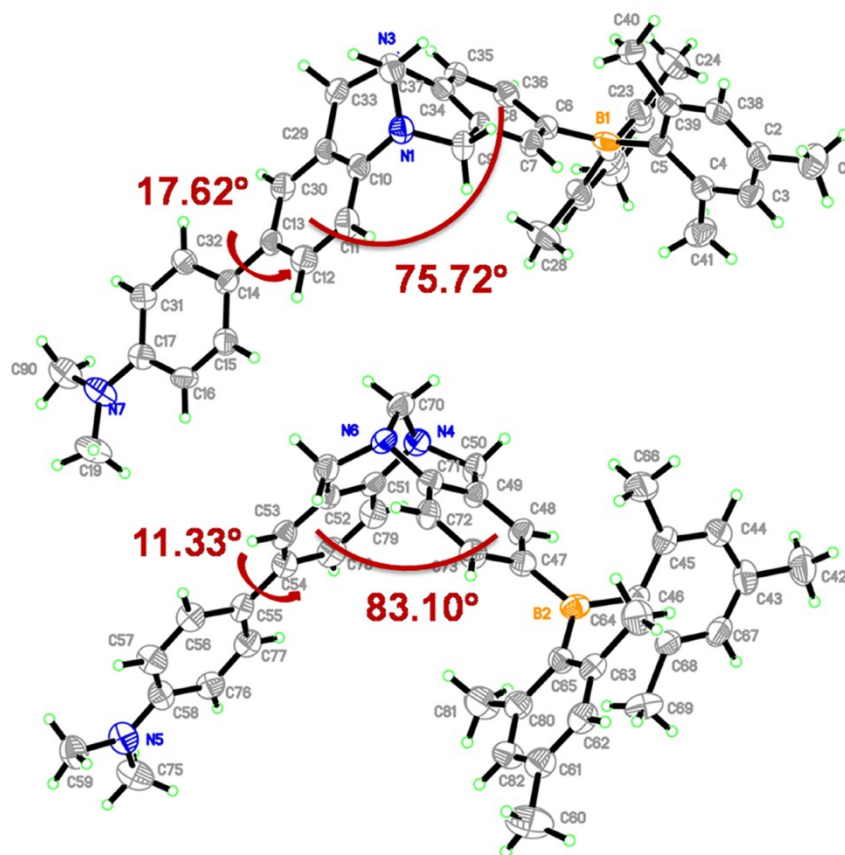

**Fig. S6.** ORTEP drawing of TBBN showing the 30% probability ellipsoids and labeling schemes.

**Table S3.** Crystal data, diffraction data, and refinement data of **TBBN**.

| Compound                                              | TBBN                                              |
|-------------------------------------------------------|---------------------------------------------------|
| Chemical formula                                      | C <sub>41</sub> H <sub>44</sub> BN <sub>3</sub>   |
| Formula weight                                        | 589.60                                            |
| Crystal system                                        | Triclinic                                         |
| Space group                                           | <i>P</i> $\bar{1}$                                |
| <i>a</i> /Å                                           | 8.660(12)                                         |
| <i>b</i> /Å                                           | 15.52(2)                                          |
| <i>c</i> /Å                                           | 25.74(4)                                          |
| $\alpha$ (°)                                          | 100.726(19)                                       |
| $\beta$ (°)                                           | 96.95(2)                                          |
| $\gamma$ (°)                                          | 93.252(19)                                        |
| Unit cell volume/ Å <sup>3</sup>                      | 3363(8)                                           |
| T/K                                                   | 296(2)                                            |
| Z                                                     | 4                                                 |
| D <sub>calcd</sub> /Mg m <sup>-3</sup>                | 1.165                                             |
| Radiation type                                        | Mo K $\alpha$ ( $\lambda$ = 0.71073Å)             |
| Absorption coefficient, $\mu$ /mm <sup>-1</sup>       | 0.067                                             |
| F(000)                                                | 1264                                              |
| $\theta$ range for data collection(°)                 | 1.34 to 27.79                                     |
|                                                       | -11 $\leq h \leq$ 11                              |
| Limiting indices                                      | -20 $\leq k \leq$ 20                              |
|                                                       | -33 $\leq l \leq$ 33                              |
| Reflections collected/unique                          | 40641/15634<br>[R(int) = 0.2267]                  |
| Final R indices ( <i>I</i> > 2 $\sigma$ ( <i>I</i> )) | R <sub>1</sub> = 0.0693, wR <sub>2</sub> = 0.1102 |
| Final R indices (all data)                            | R <sub>1</sub> = 0.3894, wR <sub>2</sub> = 0.1964 |
| Max. and min. transmission                            | 0.9983 and 0.9879                                 |
| Data/restraints/parameters                            | 15634 / 0 / 827                                   |
| Goodness of fit on F <sup>2</sup>                     | 0.832                                             |
| Largest diff. peak and hole/e Å <sup>3</sup>          | 0.187 and -0.219                                  |
| CCDC number                                           | 905360                                            |

**Table S4.** Prominent weak intermolecular forces for packing structure of **TBBN**.

| Number | Weak intermolecular interactions | Distance/Å            |                       | Shift distance <sup>c</sup> /Å | Angle <sup>d</sup> (°) | Type  |
|--------|----------------------------------|-----------------------|-----------------------|--------------------------------|------------------------|-------|
| 1      | $\pi \cdots \pi$ (C55~C77)       | 3.900(7) <sup>a</sup> | 3.762(2) <sup>b</sup> | 1.025                          | 15.24                  | A*-A* |
| 2      | $\pi \cdots \pi$ (C14~C32)       | 3.727(7) <sup>a</sup> | 3.692(2) <sup>b</sup> | 0.505                          | 7.78                   | A-A   |

<sup>a</sup> the distance between the centroids of the two  $\pi$  rings; <sup>b</sup> the vertical distance between the two  $\pi$  rings; <sup>c</sup> the slippage distance between ring (I) and perpendicular project of ring (J) on ring (I); <sup>d</sup> the sliding angle of the two  $\pi$  rings.



## Titration Measurement

### Titration of TBBN with TBAF

The titration experiments were carried out in a THF solution of **TBBN** ( $4.722 \mu\text{M}$ , 2 mL in a quartz cuvette). Then the solution was titrated with incremental amounts of fluoride ion by addition of a concentrated TBAF solution in THF ( $4.16 \times 10^{-4} \text{ M}$ ), in which **TBBN** was also included at its initial concentration to avoid the dilution effects. The fluorescence band at 518 nm and 378 nm were monitored ( $\lambda_{\text{ex}} = 313 \text{ nm}$ ).

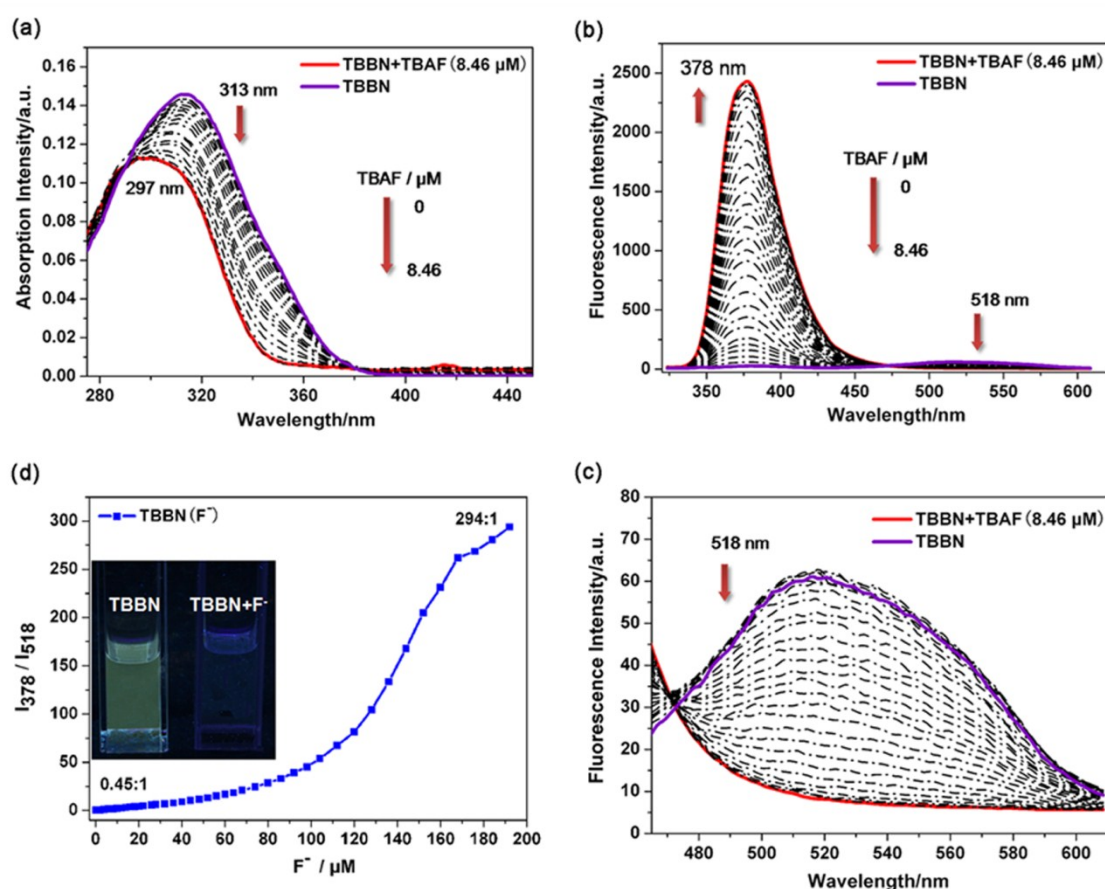

**Fig. S7.** The absorption (a) and PL (b) spectral changes of **TBBN** ( $4.722 \mu\text{M}$  in THF,  $\lambda_{\text{ex}} = 313 \text{ nm}$ ) upon addition of TBAF solution ( $4.16 \times 10^{-4} \text{ M}$ ). (c) The enlarged view of the PL spectrum change at 518 nm (d) Plot of fluorescence intensity ratio ( $I_{378}/I_{518}$ ) versus concentration of  $\text{F}^-$ . Inset in (d): Photograph of THF solution of **TBBN** before and after addition of  $\text{F}^-$  with 365 nm irradiation.



## Determination of Binding Constants

To determine the binding constants, the equations described by Connors<sup>1</sup> were used. Based on this, a plot of  $(1-I/I_0)/[F]$  vs  $I/I_0$  was made. The intensity of the native fluorescence peak in THF at 518 nm was used as the initial intensity ( $I_0$ ), and the intensity of the new fluorescence band at 378 nm as the final intensity ( $I$ ).

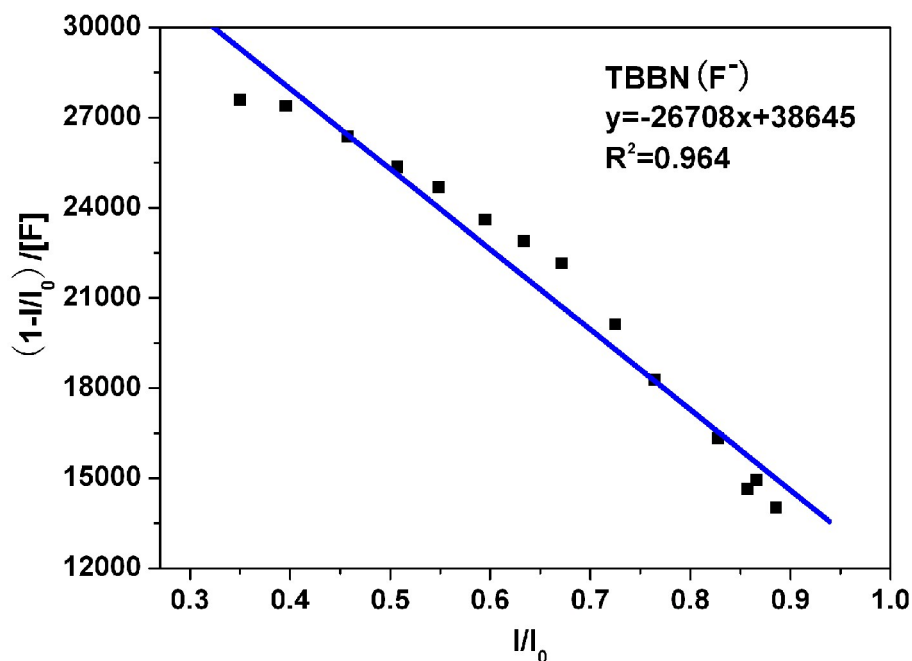

**Fig. S8.** Plot of  $(1-I/I_0)/[F]$  vs  $I/I_0$  of TBBN upon addition of TBAF. From the slope of  $(1-I/I_0)/[F]$  vs  $I/I_0$ , a binding constant  $K = 2.67 \times 10^4 \text{ M}^{-1}$  was obtained.

## Titration of TBBN with TBACN

The titration experiments on **TBBN** upon addition of TBACN were the same as on TBAF. A THF solution of **TBBN** ( $4.661 \mu\text{M}$ , 2 mL) was placed in a quartz cuvette and titrated with incremental amounts of cyanide ion by the addition of a concentrated TBACN solution in THF ( $4.531 \times 10^{-4} \text{ M}$ ), in which **TBBN** was also included at its initial concentration to avoid dilution effects. The fluorescence band at 518 nm and 378 nm were monitored ( $\lambda_{\text{ex}} = 313 \text{ nm}$ ).

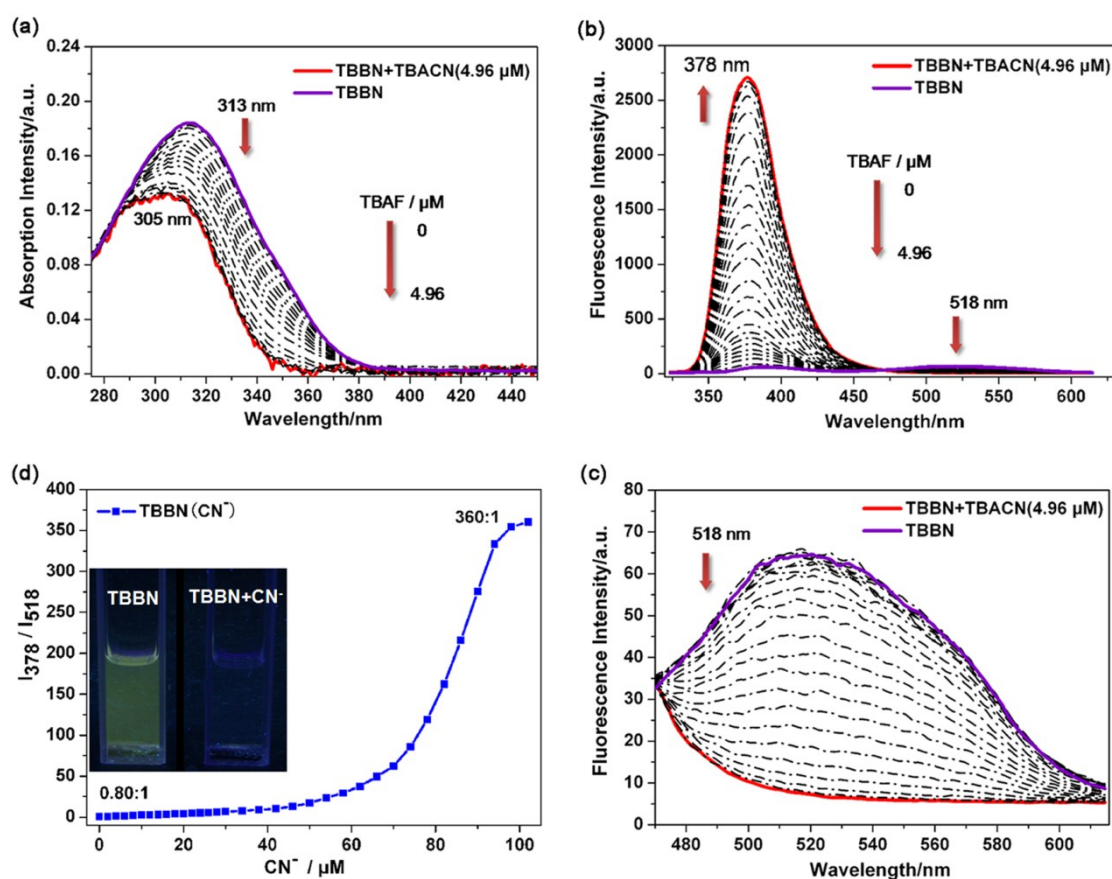

**Fig. S9.** The absorption (a) and PL (b) spectral changes of **TBBN** ( $4.661 \mu\text{M}$  in THF,  $\lambda_{\text{ex}} = 313 \text{ nm}$ ) upon addition of TBACN solution ( $4.531 \times 10^{-4} \text{ M}$ ). (c) The enlarged view of the PL spectrum change at 518 nm (d) Fluorescence intensity ratio ( $I_{378}/I_{518}$ ) versus concentration of  $\text{CN}^-$ . Inset in (d): Photographs of THF solution of **TBBN** before and after addition of  $\text{CN}^-$  with 365 nm irradiation.

## Determination of Binding Constants

Based on the equations described by Connors<sup>1</sup>, a plot of  $(1-I/I_0)/[CN]$  vs  $I/I_0$  was made. The intensity of the native fluorescence peak in THF at 518 nm was used as the initial intensity ( $I_0$ ), and the intensity of the new fluorescence band at 378 nm as the final intensity ( $I$ ).

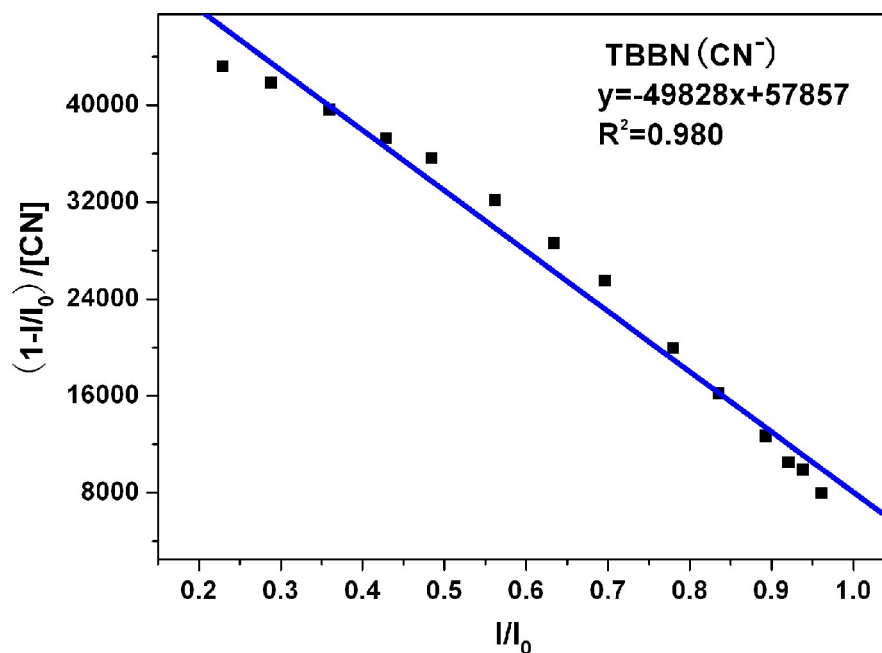

**Fig. S10.** Plot of  $(1-I/I_0)/[CN]$  vs  $I/I_0$  of **TBBN** upon addition of TBACN. From the slope of  $(1-I/I_0)/[CN]$  vs  $I/I_0$ , a binding constant  $K=5.0 \times 10^4 \text{ M}^{-1}$  was obtained.

## Titration of TBBN2 with TBAF

The titration experiments were carried out in a THF solution of **TBBN2** ( $2.099 \mu\text{M}$ , 2 mL in a quartz cuvette). Then the solution was titrated with incremental amounts of fluoride ion by addition of a concentrated TBAF solution in THF ( $4.22 \times 10^{-4} \text{ M}$ ), in which **TBBN2** was also included at its initial concentration to avoid dilution effects. The fluorescence band at 460 nm and 388 nm were monitored ( $\lambda_{\text{ex}} = 328 \text{ nm}$ ).

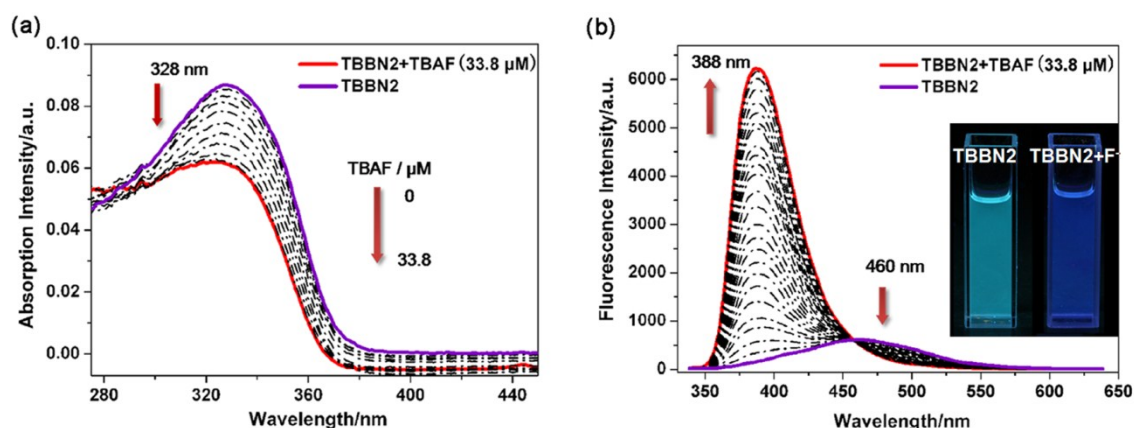

**Fig. S11.** The absorption (a) and PL (b) spectral changes of **TBBN2** ( $2.099 \mu\text{M}$  in THF,  $\lambda_{\text{ex}} = 328 \text{ nm}$ ) upon addition of TBAF solution ( $4.22 \times 10^{-4} \text{ M}$ ). Inset in (b): Photographs of THF solution of **TBBN2** before and after addition of  $\text{F}^-$  with 365 nm irradiation.

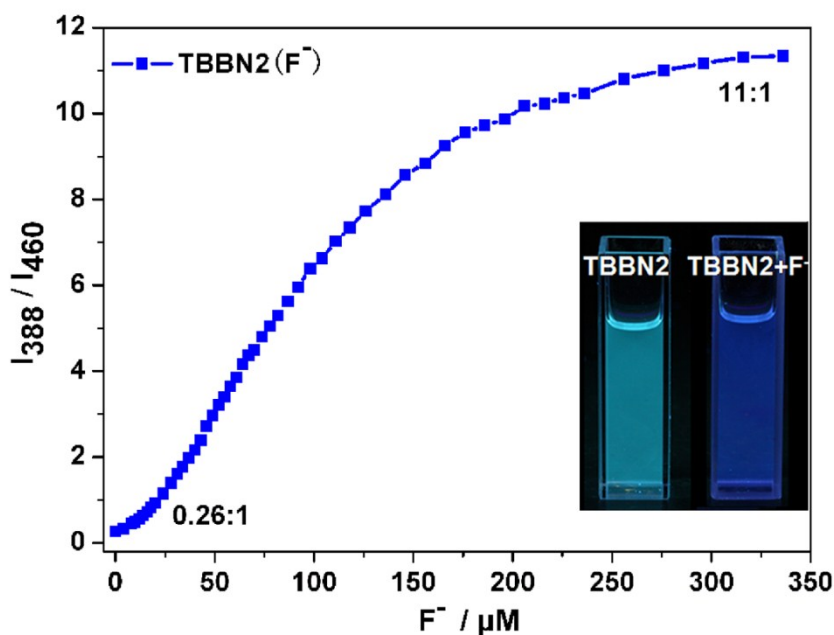

**Fig. S12.** Plot of fluorescence intensity ratio ( $I_{388}/I_{460}$ ) of **TBBN2** versus concentration of  $\text{F}^-$ .

## Determination of Binding Constants

To determine the binding constants, the equations described by Connors<sup>1</sup> were used. Based on this, a plot of  $(1-I/I_0)/[F]$  vs  $I/I_0$  was made. The intensity of the native fluorescence peak in THF at 460 nm was used as the initial intensity ( $I_0$ ), and the intensity of the new fluorescence band at 388 nm as the final intensity ( $I$ ).

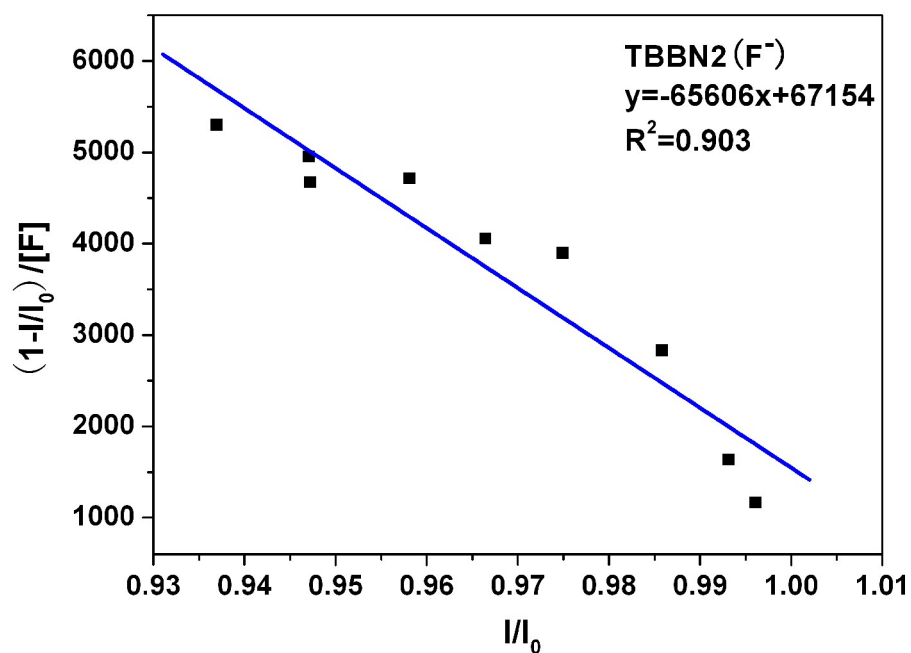

**Fig. S13.** Plot of  $(1-I/I_0)/[F]$  vs  $I/I_0$  of **TBBN2** upon addition of TBAF. From the slope of  $(1-I/I_0)/[F]$  vs  $I/I_0$ , a binding constant  $K= 6.56 \times 10^4 \text{ M}^{-1}$  was obtained.

## Titration of TBBN2 with TBACN

The titration experiments on **TBBN2** upon addition of TBACN were the same as on TBAF. A THF solution of **TBBN2** ( $2.099 \mu\text{M}$ , 2 mL) was placed in a quartz cuvette and titrated with incremental amounts of cyanide ions by the addition of a concentrated TBACN solution in THF ( $6.64 \times 10^{-4} \text{ M}$ ), in which **TBBN2** was also included at its initial concentration to avoid dilution effects. The fluorescence band at 460 nm and 388 nm were monitored ( $\lambda_{\text{ex}} = 328 \text{ nm}$ ).

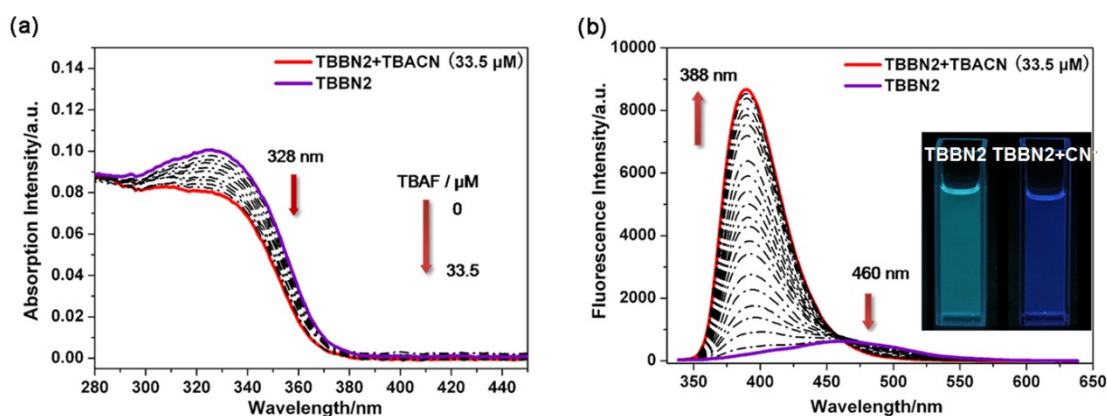

**Fig. S14.** The absorption (a) and PL (b) spectral changes of **TBBN2** ( $2.099 \mu\text{M}$  in THF,  $\lambda_{\text{ex}} = 328 \text{ nm}$ ) upon addition of TBACN solution ( $6.64 \times 10^{-4} \text{ M}$ ). Inset in (b): Photographs of THF solution of **TBBN2** before and after addition of  $\text{CN}^-$  with 365 nm irradiation.

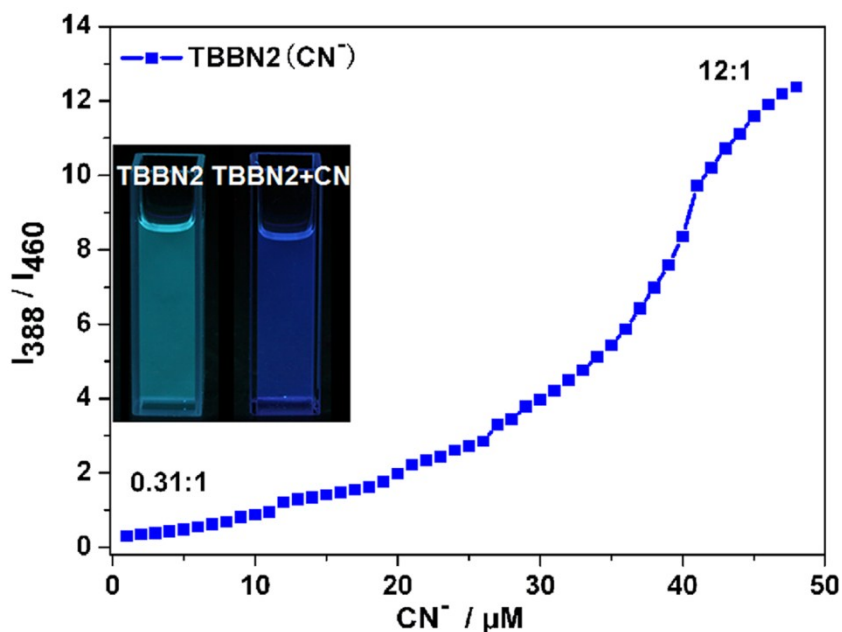

**Fig. S15.** Plot of fluorescence intensity ratio ( $I_{388}/I_{460}$ ) of **TBBN2** versus concentration of  $\text{CN}^-$ .



## Determination of Binding Constants

Based on the equations described by Connors<sup>1</sup>, a plot of  $(1-I/I_0)/[CN^-]$  vs  $I/I_0$  was made. The intensity of the native fluorescence peak in THF at 460 nm was used as the initial intensity ( $I_0$ ), and the intensity of the new fluorescence band at 388 nm as the final intensity ( $I$ ).

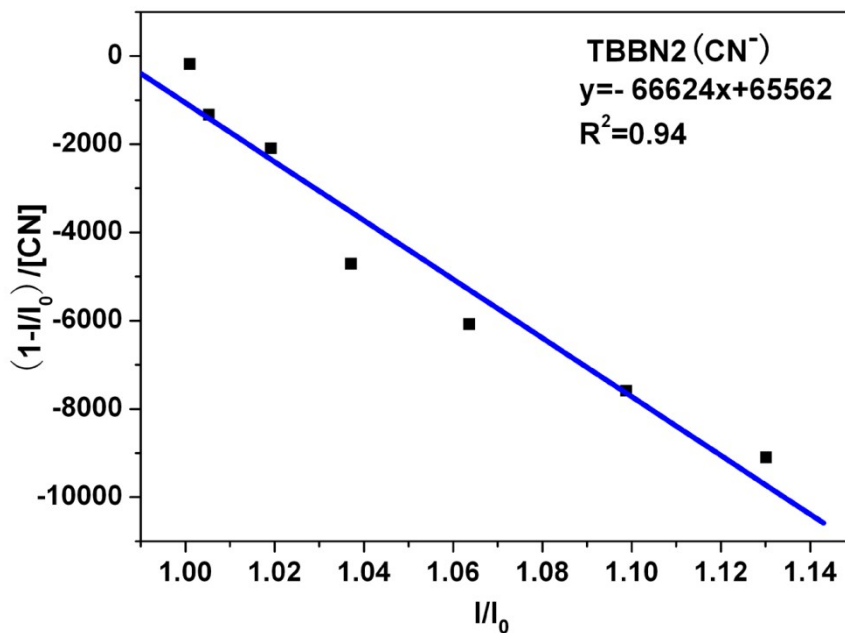

**Fig. S16.** Plot of  $(1-I/I_0)/[CN^-]$  vs  $I/I_0$  of **TBBN2** upon addition of TBACN. From the slope of  $(1-I/I_0)/[CN^-]$  vs  $I/I_0$ , a binding constant  $K = 6.66 \times 10^4 \text{ M}^{-1}$  was obtained.

## Titration of TBB with TBAF

The titration experiments were carried out in a THF solution of **TBB** ( $4.372 \mu\text{M}$ , 2 mL in a quartz cuvette). Then the solution was titrated with incremental amounts of fluoride ion by the addition of a concentrated TBAF solution in THF ( $4.24 \times 10^{-4} \text{ M}$ ), in which **TBB** was also included at its initial concentration to avoid dilution effects. The fluorescence band at 388 nm was monitored ( $\lambda_{\text{ex}} = 330 \text{ nm}$ ).

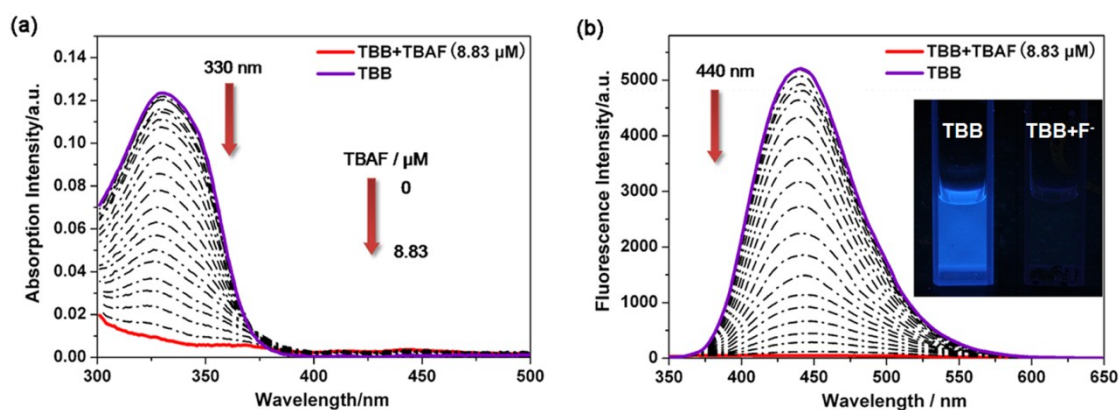

**Fig. S17.** The absorption (a) and PL (b) spectral changes of **TBB** ( $4.372 \mu\text{M}$  in THF,  $\lambda_{\text{ex}} = 330 \text{ nm}$ ) upon addition of TBAF solution ( $4.24 \times 10^{-4} \text{ M}$ ). The inset in (b) shows the photographs of THF solution of **TBB** before and after addition of  $\text{F}^-$  with 365 nm irradiation.

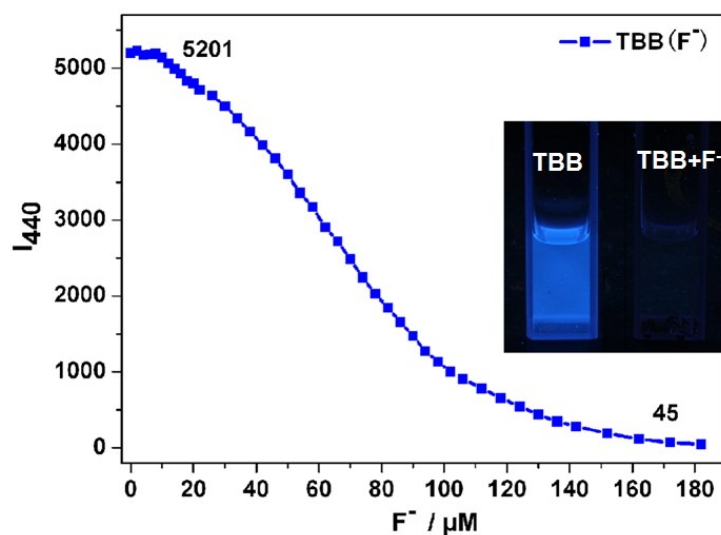

**Fig. S18.** Plot of fluorescence intensity change of **TBB** at 440 nm ( $I_{440}$ ) versus concentration of  $\text{F}^-$ .

## Determination of Binding Constants

To determine the binding constants, the equations described by Connors<sup>1</sup> were used. Based on this, a plot of  $(1-I/I_0)/[F]^2$  vs  $I/I_0$  was made. The fluorescence intensity at 440 nm was used as the initial intensity ( $I_0$ ), and the intensity change at 440 nm upon addition of TBAF as the final intensity ( $I$ ).

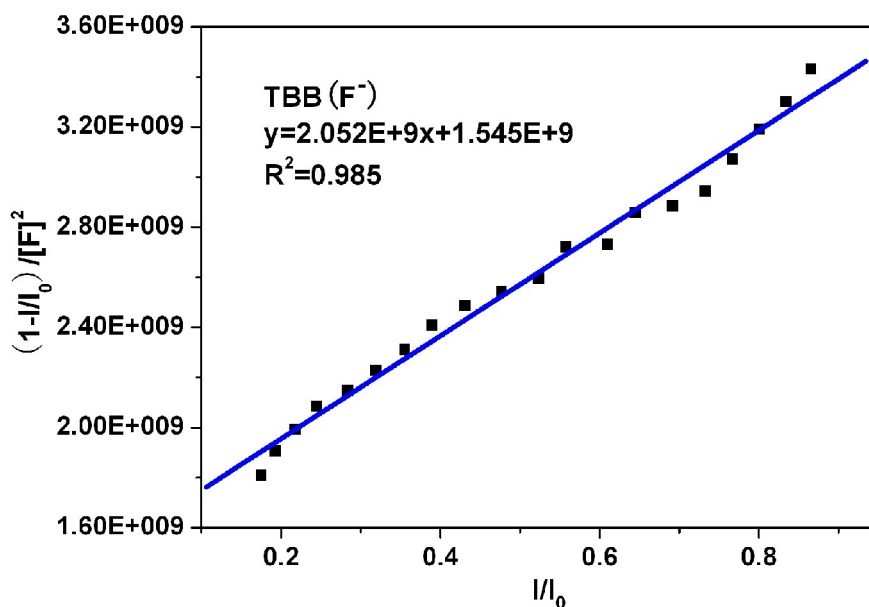

**Fig. S19.** Plot of  $(1-I/I_0)/[F]^2$  vs  $I/I_0$  of **TBB** upon addition of TBAF. From the slope of  $(1-I/I_0)/[F]^2$  vs  $I/I_0$ , a binding constant  $K = 2.05 \times 10^9 \text{ M}^{-2}$  was obtained.

## Titration of TBB with TBACN

The titration experiments on **TBB** upon addition of TBACN were the same as on TBAF. A THF solution of **TBB** ( $4.698 \mu\text{M}$ , 2 mL) was placed in a quartz cuvette and titrated with incremental amounts of cyanide ion by addition of a concentrated TBACN solution in THF ( $4.45 \times 10^{-4} \text{ M}$ ), in which **TBB** was also included at its initial concentration to avoid dilution effects. The fluorescence band at 388 nm was monitored ( $\lambda_{\text{ex}} = 330 \text{ nm}$ ).

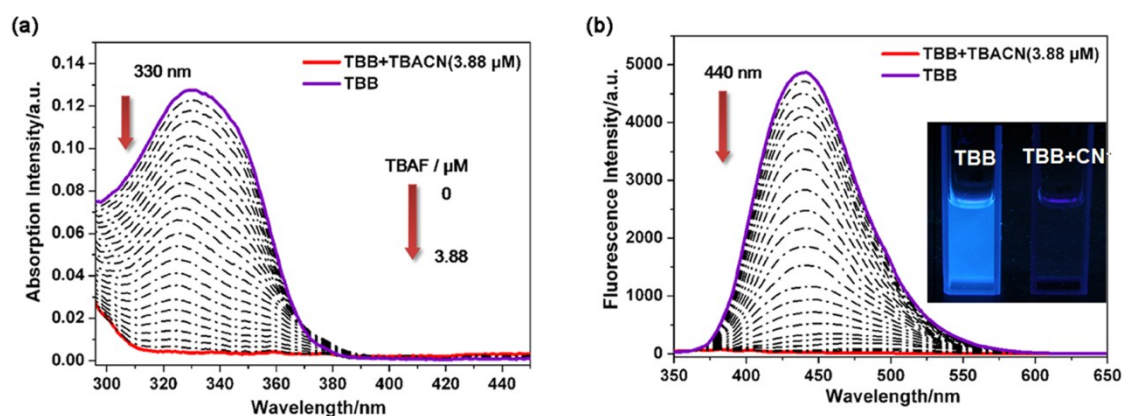

**Fig. S20.** The absorption (a) and PL (b) spectral changes of **TBB** ( $4.698 \mu\text{M}$  in THF,  $\lambda_{\text{ex}} = 330 \text{ nm}$ ) upon addition of TBACN solution ( $4.45 \times 10^{-4} \text{ M}$ ). The inset in (b) shows the photographs of THF solution of **TBB** before and after addition of CN<sup>-</sup> with 365 nm irradiation.

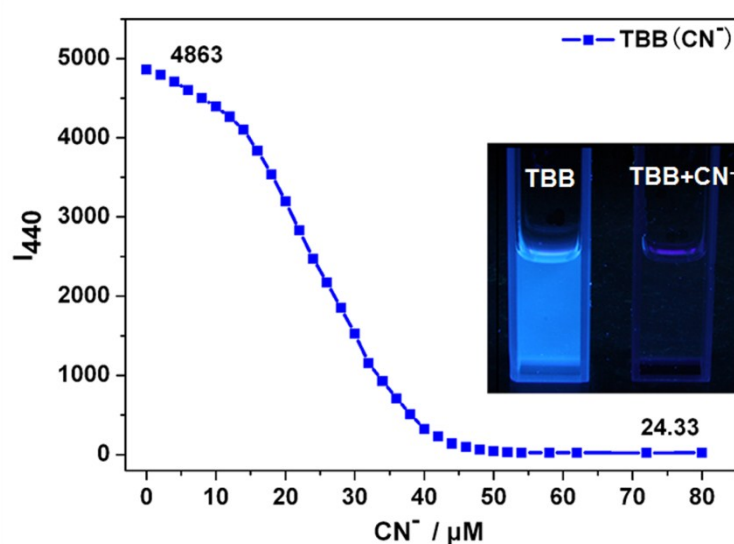

**Fig. S21.** Plot of fluorescence intensity change of **TBB** at 440 nm ( $I_{440}$ ) versus concentration of CN<sup>-</sup>.

## Determination of Binding Constants

Based on the equations described by Connors<sup>1</sup>, a plot of  $(1-I/I_0)/[CN]^{-2}$  vs  $I/I_0$  was made. The fluorescence intensity at 440 nm was used as the initial intensity ( $I_0$ ), and the intensity change at 440 nm upon addition of TBACN as the final intensity ( $I$ ).

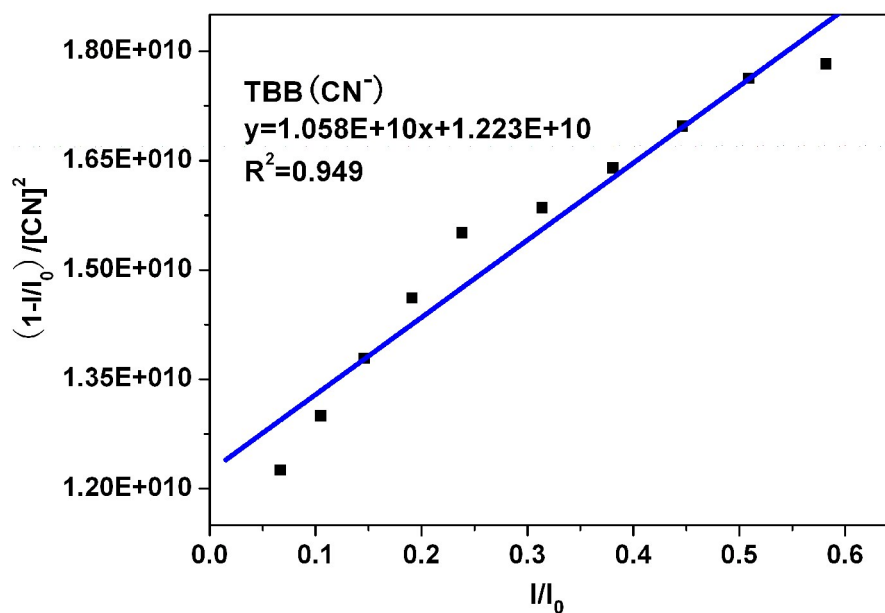

**Fig. S22.** Plot of  $(1-I/I_0)/[CN]^{-2}$  vs  $I/I_0$  of **TBB** upon addition of TBACN. From the slope of  $(1-I/I_0)/[CN]^{-2}$  vs  $I/I_0$ , a binding constant  $K= 1.06 \times 10^{10} M^{-2}$  was obtained.

## NMR Titrations of TBBN, TBBN2 and TBB with fluoride

### $^{19}\text{F}$ NMR Titration of TBBN with fluoride ion in $\text{CD}_2\text{Cl}_2$

All the  $^{19}\text{F}$  NMR titration experiments were recorded with a Bruker 300 spectrometer in  $\text{CD}_2\text{Cl}_2$ . To a  $\text{CD}_2\text{Cl}_2$  solution of TBAF (0.013 M, 1 mL) in the NMR tube, incremental amounts of **TBBN** powder were added to produce **TBBN** solutions with concentrations of 0.0020 M, 0.0042 M, 0.0067 M, 0.0092 M, 0.012 M and 0.016 M. When there was no  $^{19}\text{F}$  NMR spectral change observed in the process, excess TBACl was added ( $[\text{TBACl}]/[\text{TBAF}]=2.64$ ) to investigate the selectivity of **TBBN** for fluoride. The  $^{19}\text{F}$  NMR spectral change was monitored during the whole experiment, and the signals for free  $\text{F}^-$  and bound  $\text{F}^-$  were recorded. It was noted that about 1 equivalent of **TBBN** was needed to consume all of the starting fluoride ion, indicating the formation of a 1:1 complex.

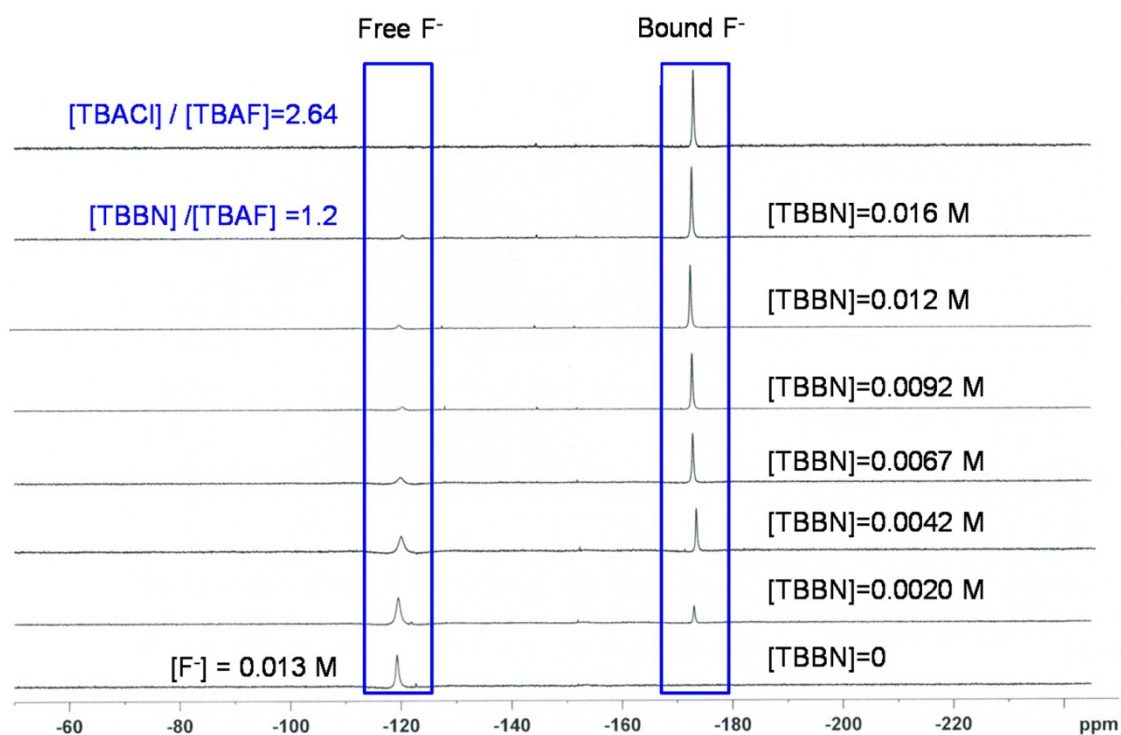

**Fig. S23.**  $^{19}\text{F}$  NMR spectra of **TBBN** before and after the addition of TBAF in  $\text{CD}_2\text{Cl}_2$ . The top is the  $^{19}\text{F}$  NMR spectrum of **TBBN** after the addition of TBACl ( $[\text{TBACl}]/[\text{TBAF}]=2.64$ ).



## <sup>19</sup>F NMR Titration of TBBN2 with fluoride ion in CD<sub>2</sub>Cl<sub>2</sub>

To a CD<sub>2</sub>Cl<sub>2</sub> solution of TBAF (0.013 M, 1 mL) in the NMR tube, incremental amounts of **TBBN2** powder were added to produce **TBBN2** solutions with concentrations of 0.0020 M, 0.0042 M, 0.0065 M, 0.0086 M, 0.011 M and 0.013 M. When there was no <sup>19</sup>F NMR spectral change observed in the process, excess TBACl was added ([TBACl]/[TBAF]=2) to investigate the selectivity of **TBBN2** for fluoride. The <sup>19</sup>F NMR spectral change was monitored during the whole experiment, and the signals for free F<sup>-</sup> and bound F<sup>-</sup> were recorded. It was noted that about 1 equivalent of **TBBN2** was needed to consume all of the starting fluoride ion, indicating the formation of a 1:1 complex.

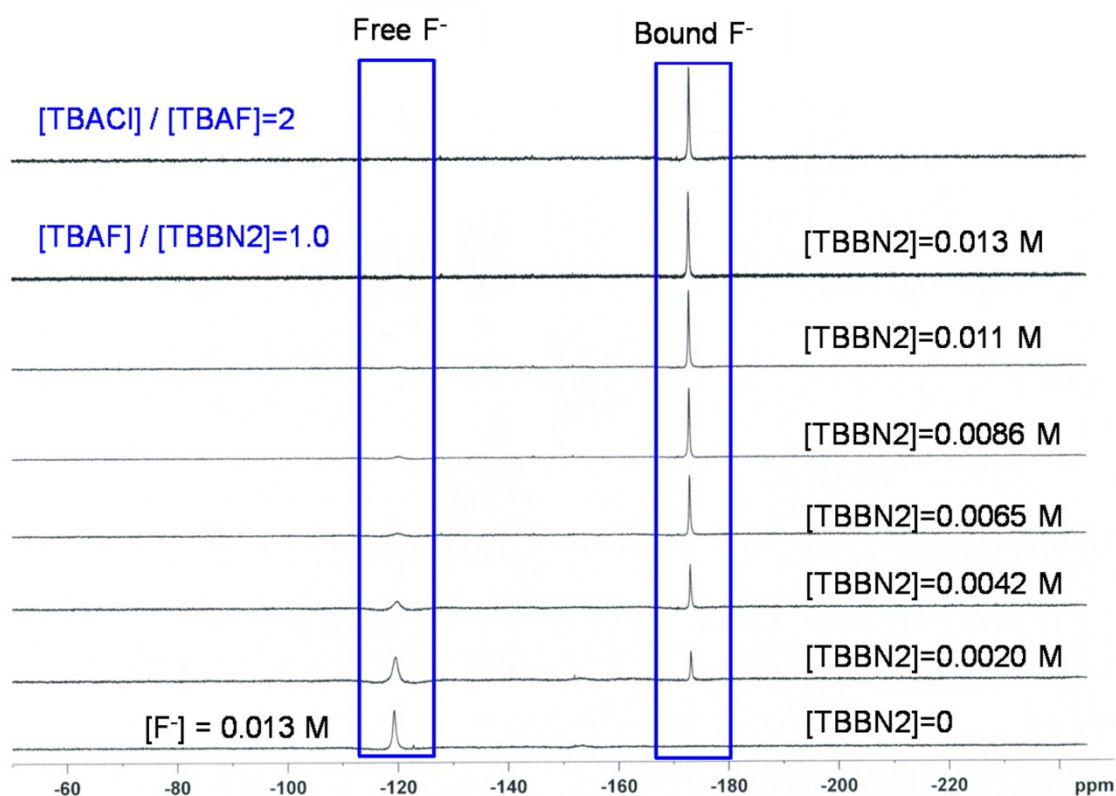

**Fig. S24.** <sup>19</sup>F NMR spectra of **TBBN2** before and after the addition of TBAF in CD<sub>2</sub>Cl<sub>2</sub>. The top is the <sup>19</sup>F NMR spectrum of **TBBN2** after the addition of TBACl ([TBACl]/[TBAF]=2).

## <sup>19</sup>F NMR Titration of TBB with fluoride ion in CD<sub>2</sub>Cl<sub>2</sub>

To a CD<sub>2</sub>Cl<sub>2</sub> solution of TBAF (0.025 M, 1 mL) in the NMR tube, incremental amounts of **TBB** powder were added to produce the **TBB** solutions with concentrations of 0.0020 M, 0.0041 M, 0.0064 M, 0.0089 M, and 0.011 M. When there was no <sup>19</sup>F NMR spectral change observed in the process, excess TBACl was added ([TBACl]/[TBAF]=1.98) to investigate the selectivity of **TBB** for fluoride. The <sup>19</sup>F NMR spectral change was monitored during the whole experiment, and the signals for free F<sup>-</sup> and bound F<sup>-</sup> were recorded. It was noted that about 0.5 equivalent of **TBB** was needed to consume all of the starting fluoride ion, indicating the formation of a 2:1 complex.

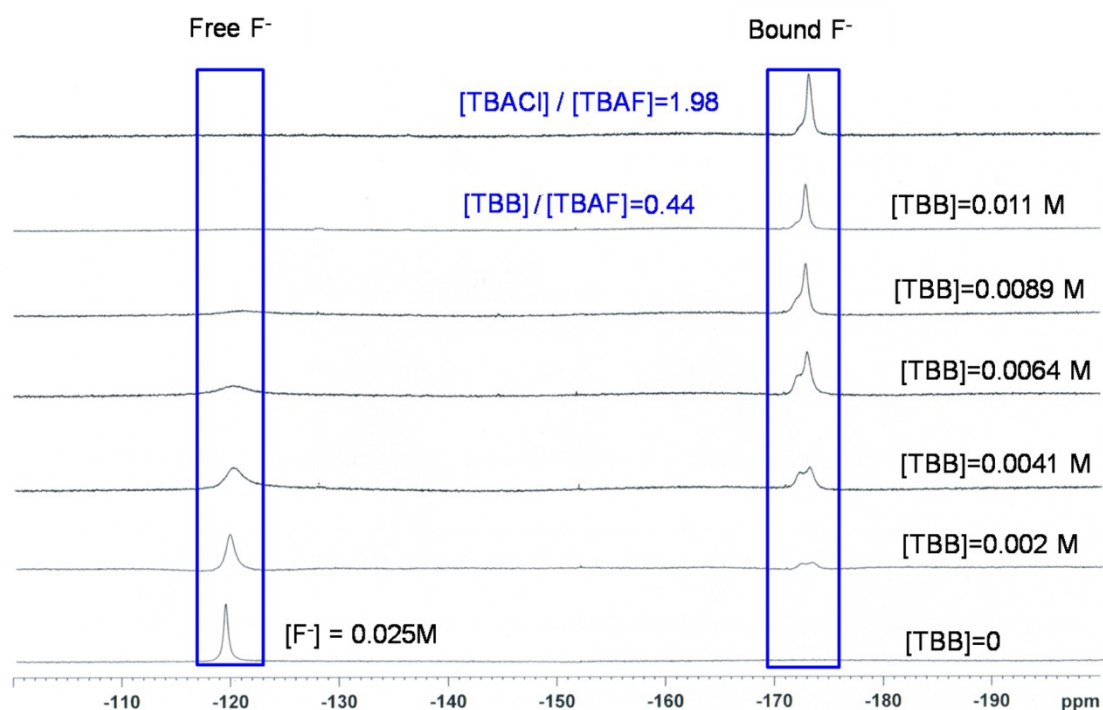

**Fig. S25.** <sup>19</sup>F NMR spectra of **TBB** before and after the addition of TBAF in CD<sub>2</sub>Cl<sub>2</sub>. The top is the <sup>19</sup>F NMR spectrum of **TBB** after the addition of TBACl ([TBACl]/[TBAF]=1.98).

## Titration of TBBN with various anions.

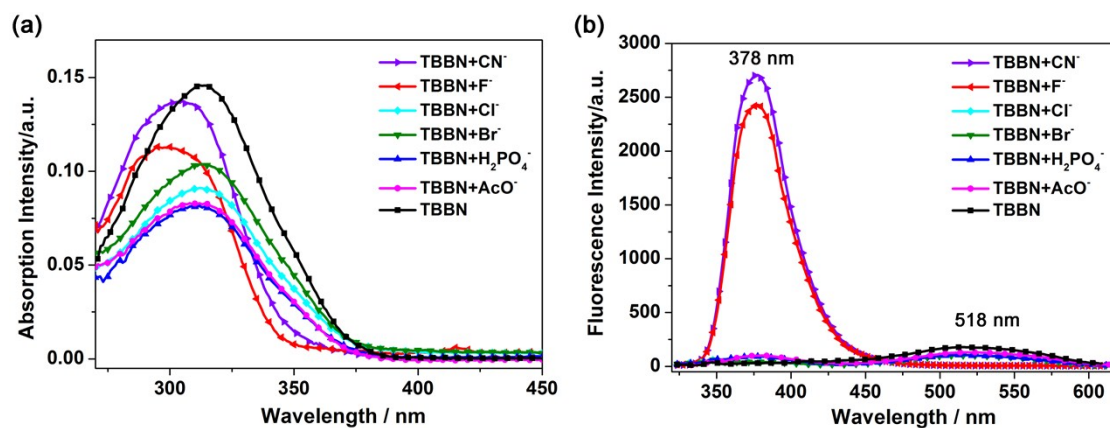

**Fig. S26.** Absorption (a) and PL (b) spectral changes of **TBBN** (2.09 μM in THF,  $\lambda_{\text{ex}}=313\text{nm}$ ) upon addition of an excess of acetate, phosphate, bromide, chloride, fluoride and cyanide ions in THF solutions (193 μM). All the anions were used as tetrabutylammonium salts.

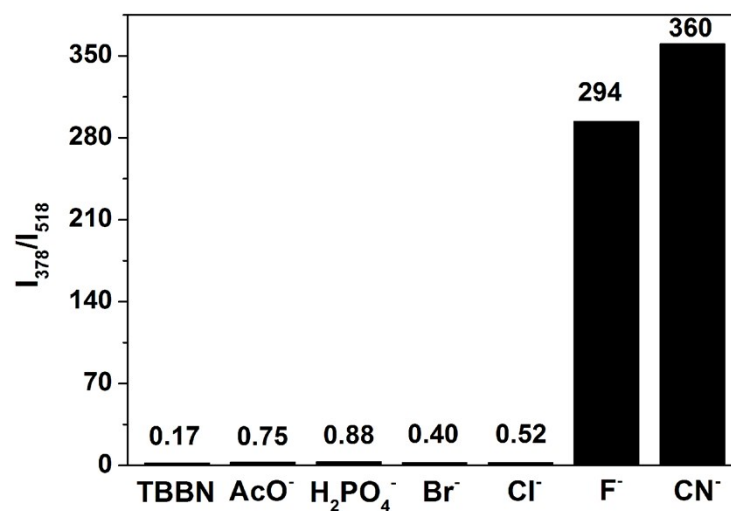

**Fig. S27.** A comparison of fluorescence intensity ratio ( $I_{378}/I_{518}$ ) of **TBBN** in THF solution (2.09 μM) upon addition of an excess of various anions (193 μM). Plot clearly indicates that **TBBN** shows higher selectivity for F<sup>-</sup> and CN<sup>-</sup> over Cl<sup>-</sup>, Br<sup>-</sup>, AcO<sup>-</sup> and H<sub>2</sub>PO<sub>4</sub><sup>-</sup>.

## Titration of TBBN2 with various anions.

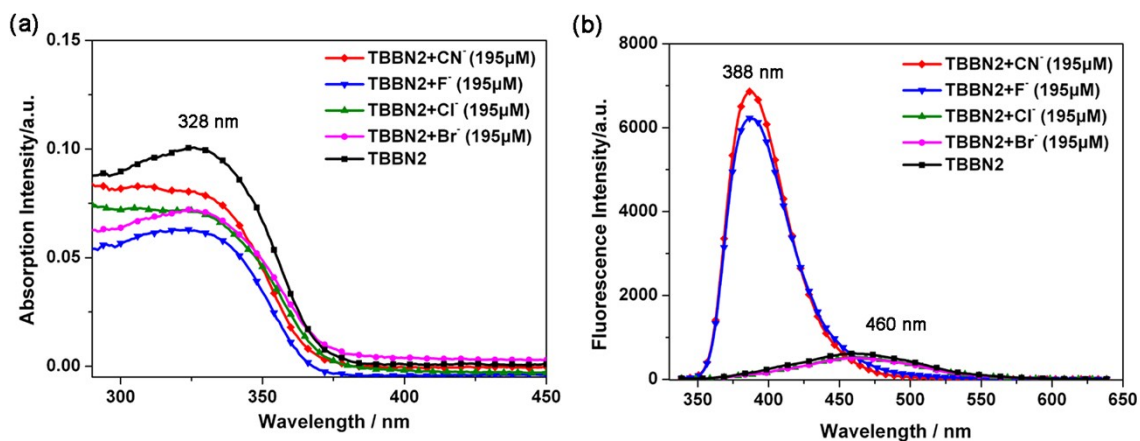

**Fig. S28.** Absorption (a) and PL (b) spectral changes of **TBBN2** (2.15  $\mu\text{M}$  in THF,  $\lambda_{\text{ex}}=328\text{nm}$ ) upon addition of an excess of bromide, chloride, fluoride and cyanide ions in THF solutions (195  $\mu\text{M}$ ).

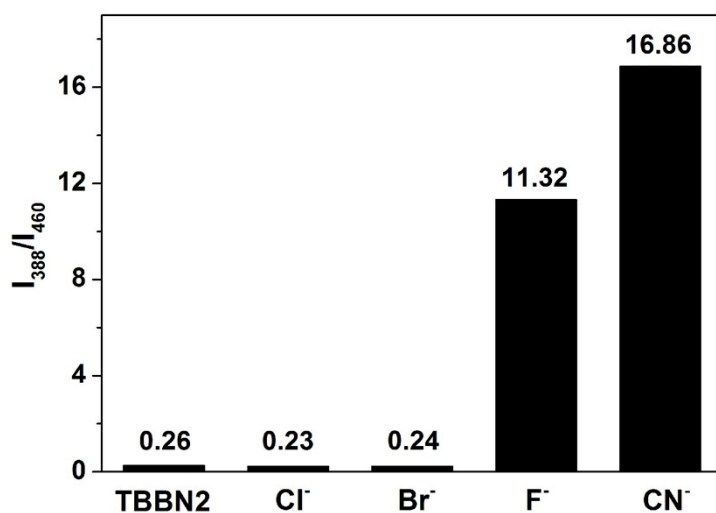

**Fig. S29.** A comparison of fluorescence intensity ratio ( $I_{388}/I_{460}$ ) of **TBBN2** in THF solution (2.15  $\mu\text{M}$ ) after addition of an excess of various anions (195  $\mu\text{M}$ ).

### Titration of TBB with various anions.

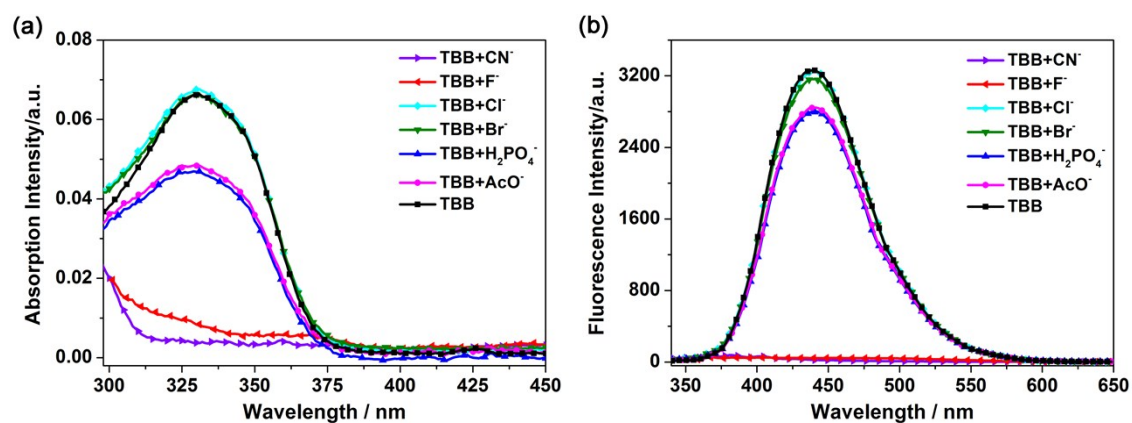

**Fig. S30.** Absorption (a) and PL (b) spectral changes of **TBB** (2.45  $\mu\text{M}$  in THF,  $\lambda_{\text{ex}}=330\text{nm}$ ) upon addition of an excess of acetate, phosphate, bromide, chloride, fluoride and cyanide ions in THF solutions (167 $\mu\text{M}$ ).

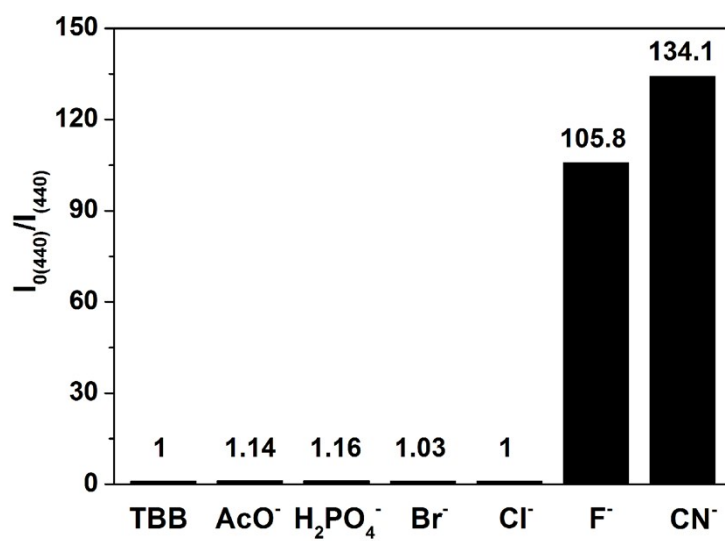

**Fig. S31.** A comparison of fluorescence intensity at 440 nm of **TBB** in THF solution (2.45  $\mu\text{M}$ ) before and after addition of an excess of various anions (167  $\mu\text{M}$ ).

## High Resolution Mass Spectra.

|               |                  |             |          |                 |              |                        |                       |
|---------------|------------------|-------------|----------|-----------------|--------------|------------------------|-----------------------|
| Sample Name   | 2012-0529-TBBr   | Position    | P1-E3    | Instrument Name | Instrument 1 | User Name              |                       |
| Inj Vol       | -1               | InjPosition |          | SampleType      | Sample       | IRM Calibration Status | Success               |
| Data Filename | 2012-0529-TBBr.d | ACQ Method  | 0319-1.m | Comment         |              | Acquired Time          | 5/29/2012 10:29:50 AM |

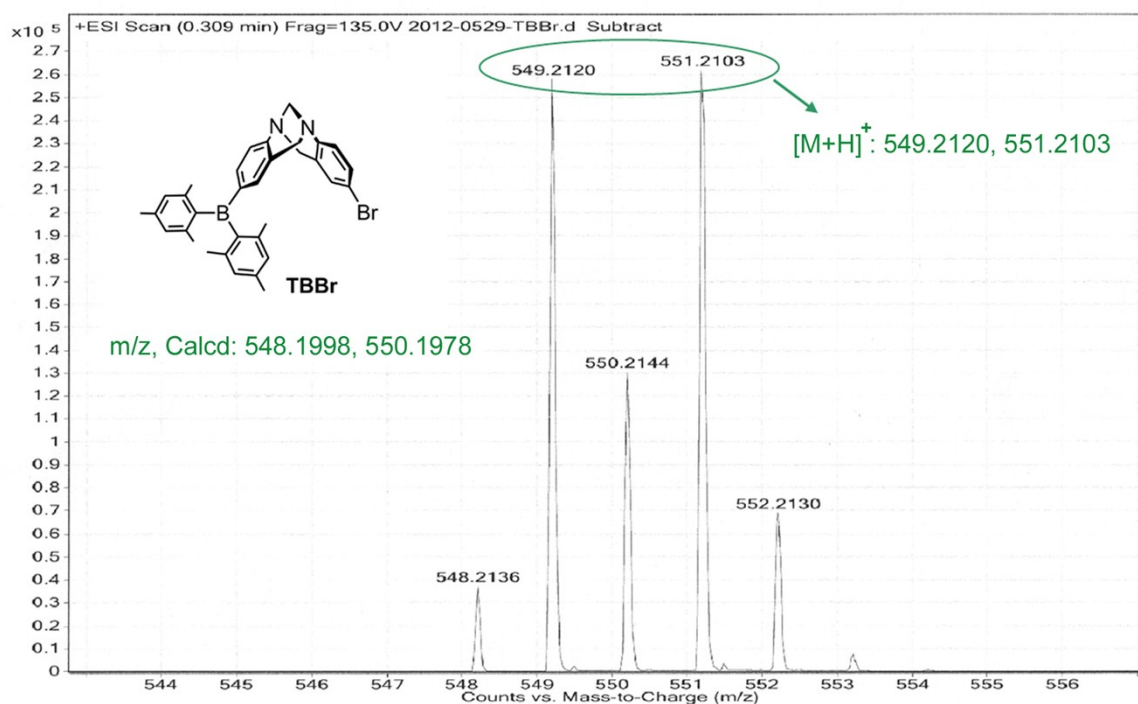

**Fig. S32.** High resolution mass spectra of TBBr.

|               |                  |             |          |                 |              |                        |                       |
|---------------|------------------|-------------|----------|-----------------|--------------|------------------------|-----------------------|
| Sample Name   | 2012-0529-TBBN   | Position    | P1-E3    | Instrument Name | Instrument 1 | User Name              |                       |
| Inj Vol       | -1               | InjPosition |          | SampleType      | Sample       | IRM Calibration Status | Success               |
| Data Filename | 2012-0529-TBBN.d | ACQ Method  | 0319-1.m | Comment         |              | Acquired Time          | 5/29/2012 10:31:31 AM |

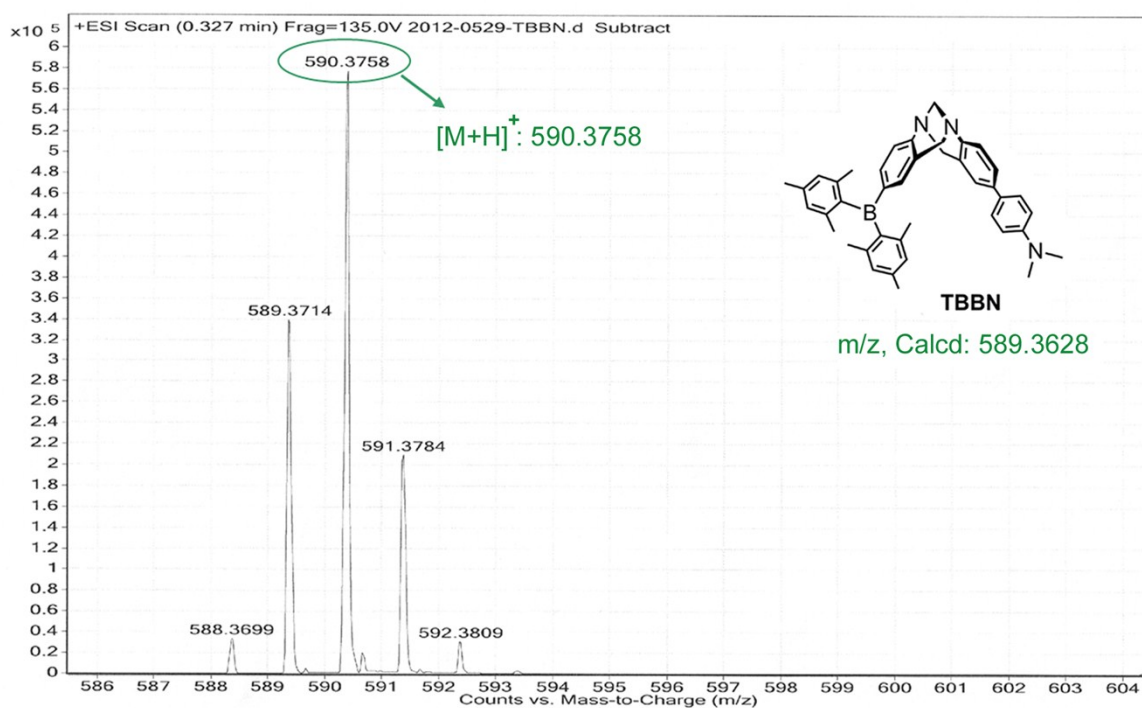

**Fig. S33.** High resolution mass spectra of TBBN.



|                      |                   |                    |          |                        |              |                               |                       |
|----------------------|-------------------|--------------------|----------|------------------------|--------------|-------------------------------|-----------------------|
| <b>Sample Name</b>   | 2012-0529-TBBN2   | <b>Position</b>    | P1-D3    | <b>Instrument Name</b> | Instrument 1 | <b>User Name</b>              |                       |
| <b>Inj Vol</b>       | -1                | <b>InjPosition</b> |          | <b>SampleType</b>      | Sample       | <b>IRM Calibration Status</b> | Success               |
| <b>Data Filename</b> | 2012-0529-TBBN2.d | <b>ACQ Method</b>  | 0319-1.m | <b>Comment</b>         |              | <b>Acquired Time</b>          | 5/29/2012 10:33:11 AM |

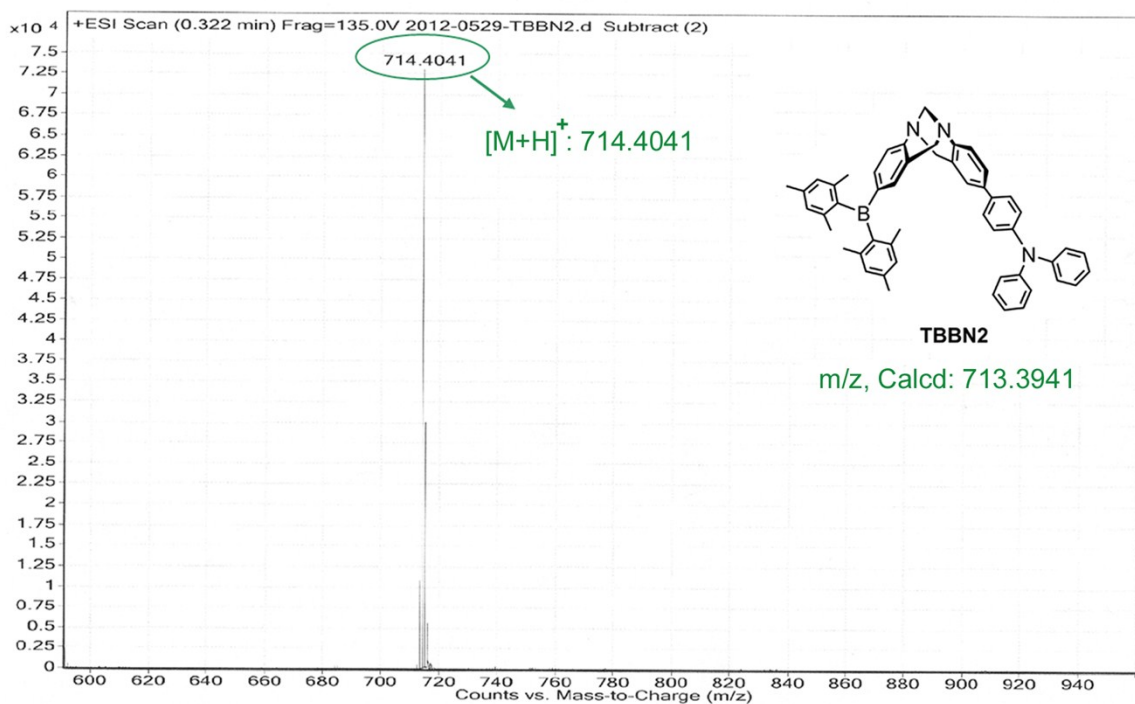

**Fig. S34.** High resolution mass spectra of TBBN2.

|                      |                  |                    |        |                        |              |                               |                     |
|----------------------|------------------|--------------------|--------|------------------------|--------------|-------------------------------|---------------------|
| <b>Sample Name</b>   | 2013-0605-TBNN   | <b>Position</b>    | P1-D8  | <b>Instrument Name</b> | Instrument 1 | <b>User Name</b>              |                     |
| <b>Inj Vol</b>       | -1               | <b>InjPosition</b> |        | <b>SampleType</b>      | Sample       | <b>IRM Calibration Status</b> | Success             |
| <b>Data Filename</b> | 2013-0605-TBNN.d | <b>ACQ Method</b>  | 0103.m | <b>Comment</b>         |              | <b>Acquired Time</b>          | 6/5/2013 3:57:31 PM |

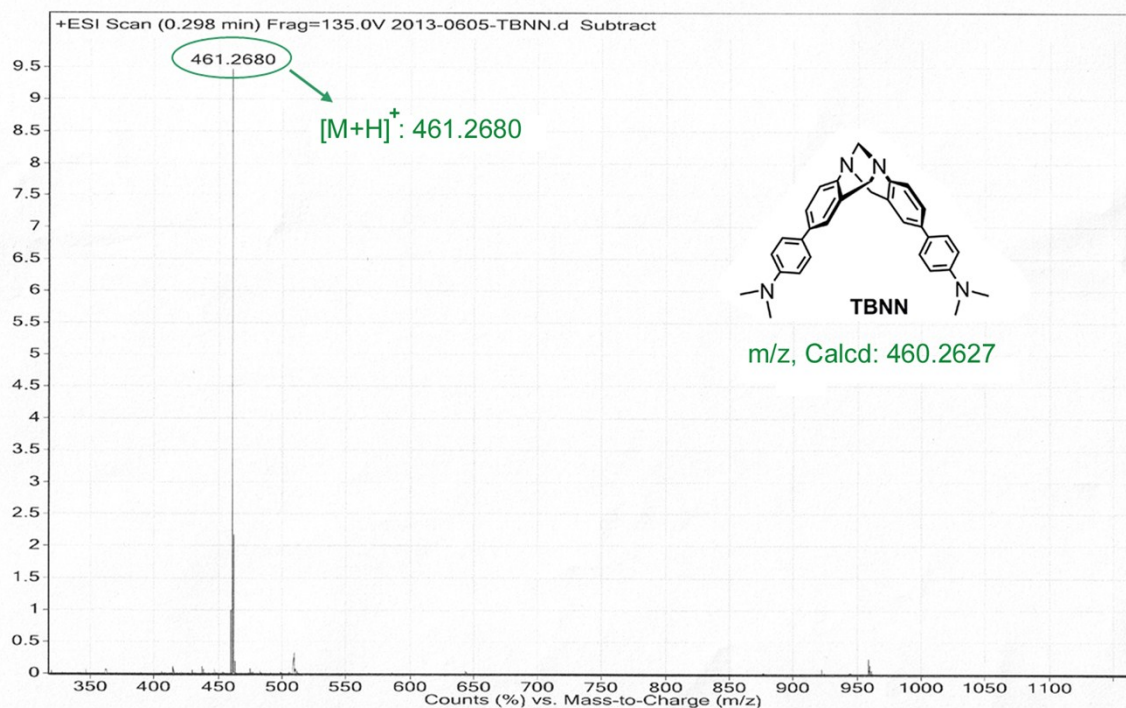

**Fig. S35.** High resolution mass spectra of TBNN.

## Reference

(1) Connors, K. A. *Binding Constants*; John Wiley and Sons: New York, 1987.
